# Supplementary material
Source: PubMed Central journal article supplement (PMC3479675)

SI\_1

# DNA Backbone Epsilon

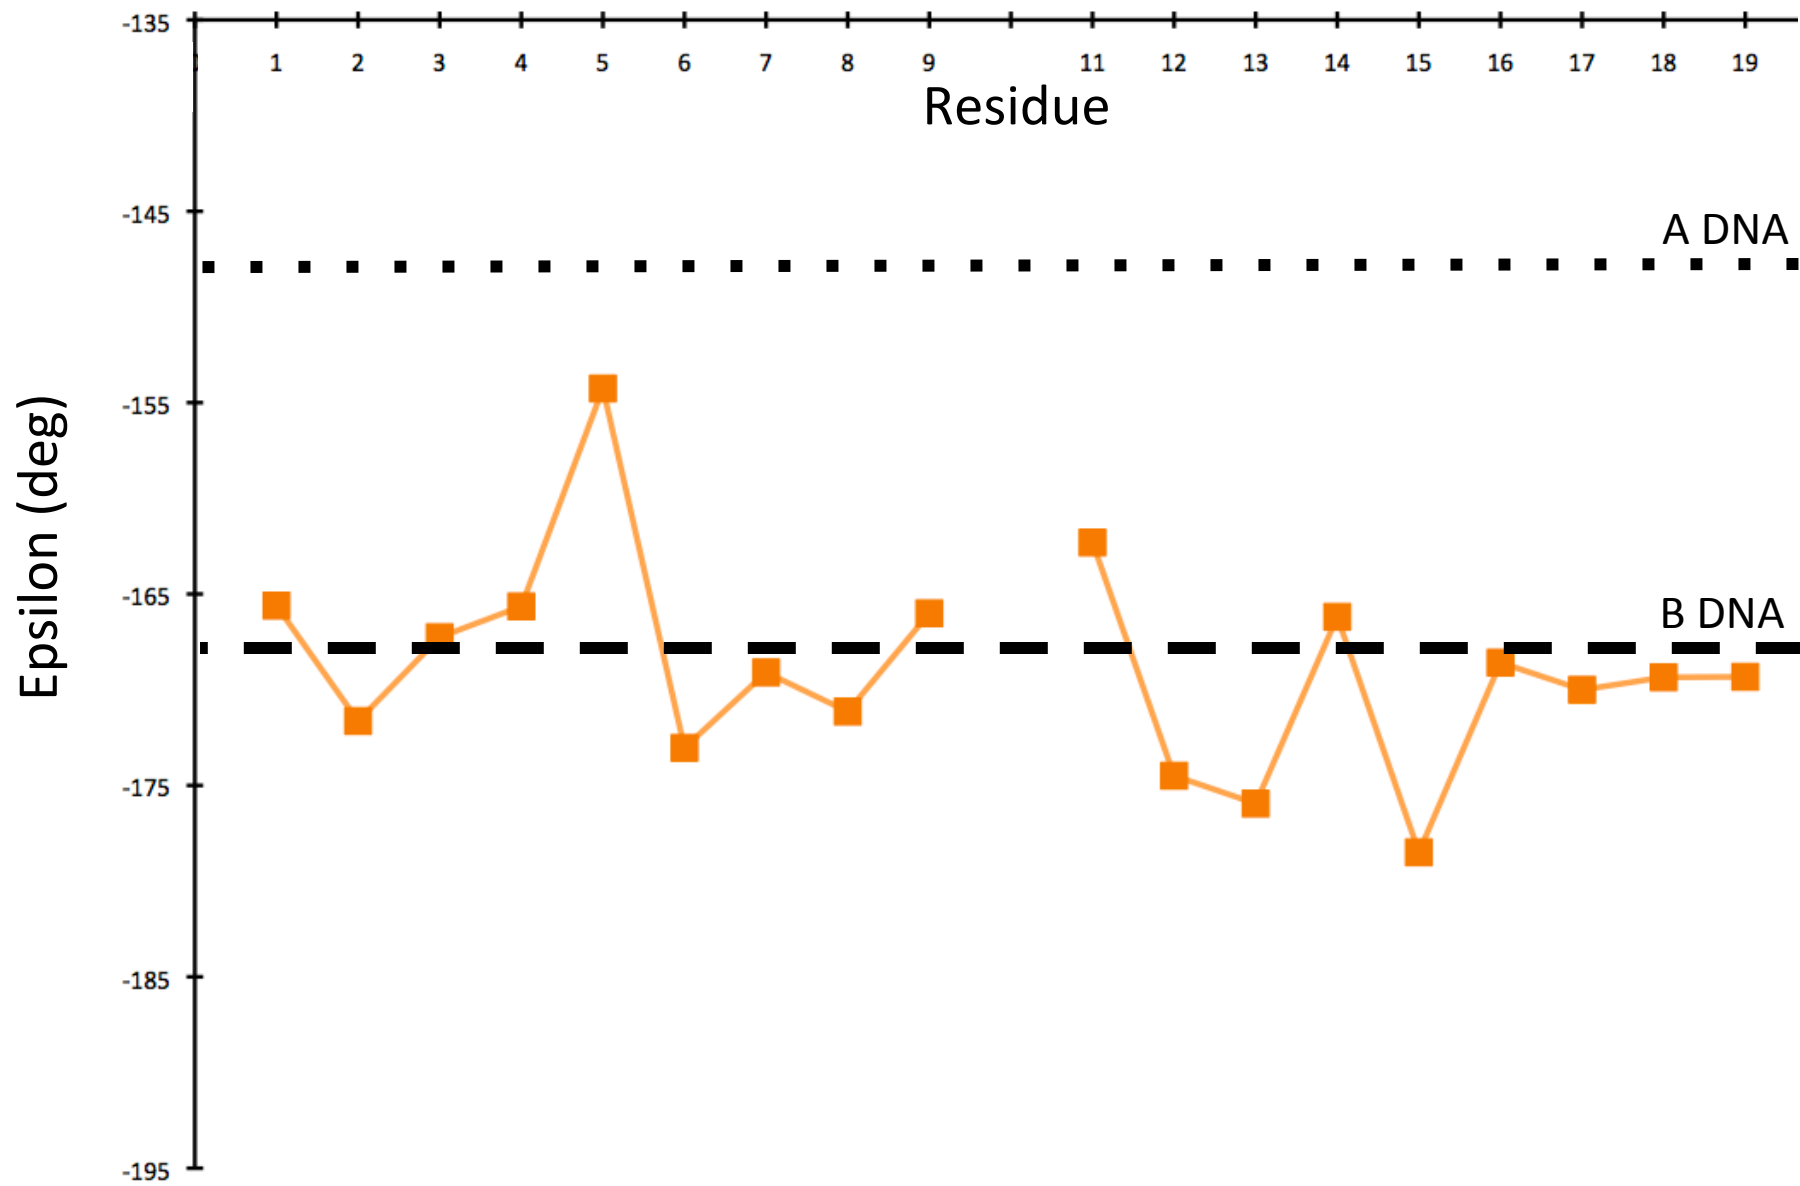

Base-H1' pathway for the C $\alpha$ AG Duplex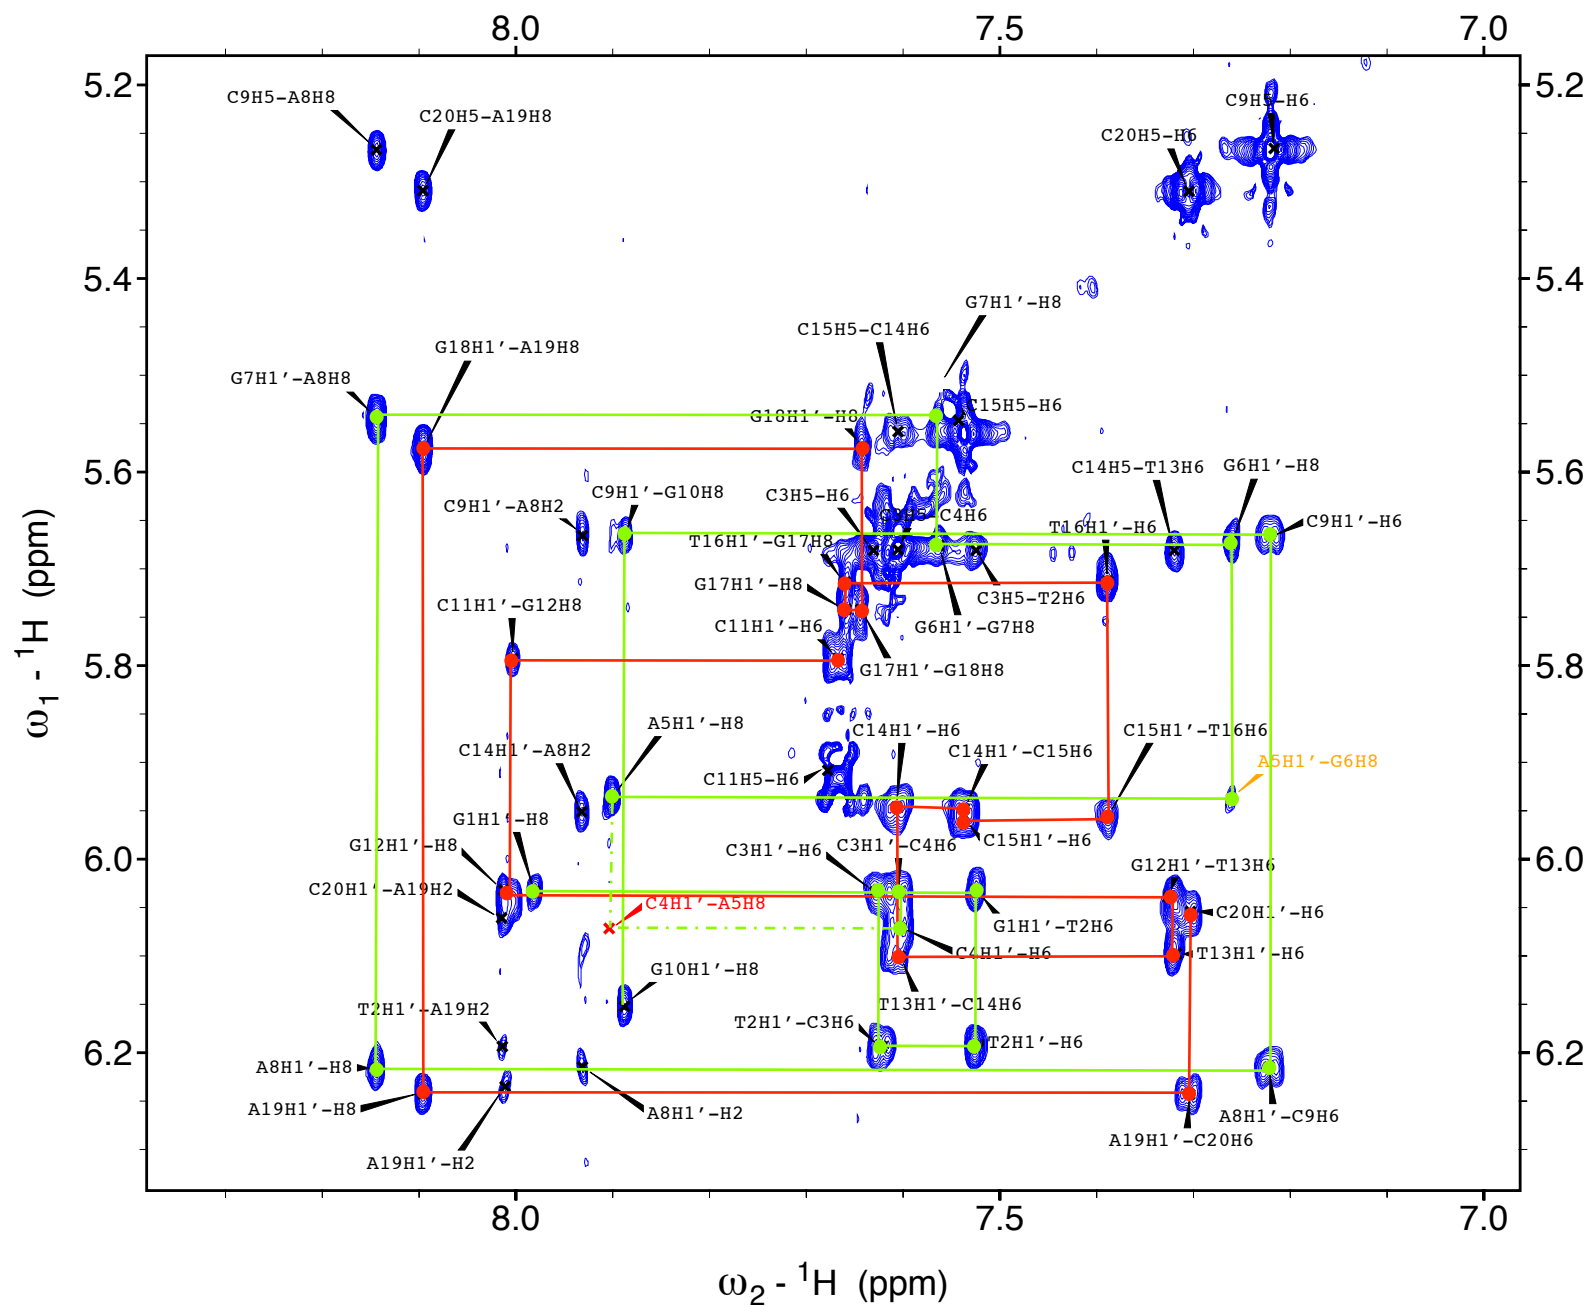

**C $\alpha$ AG**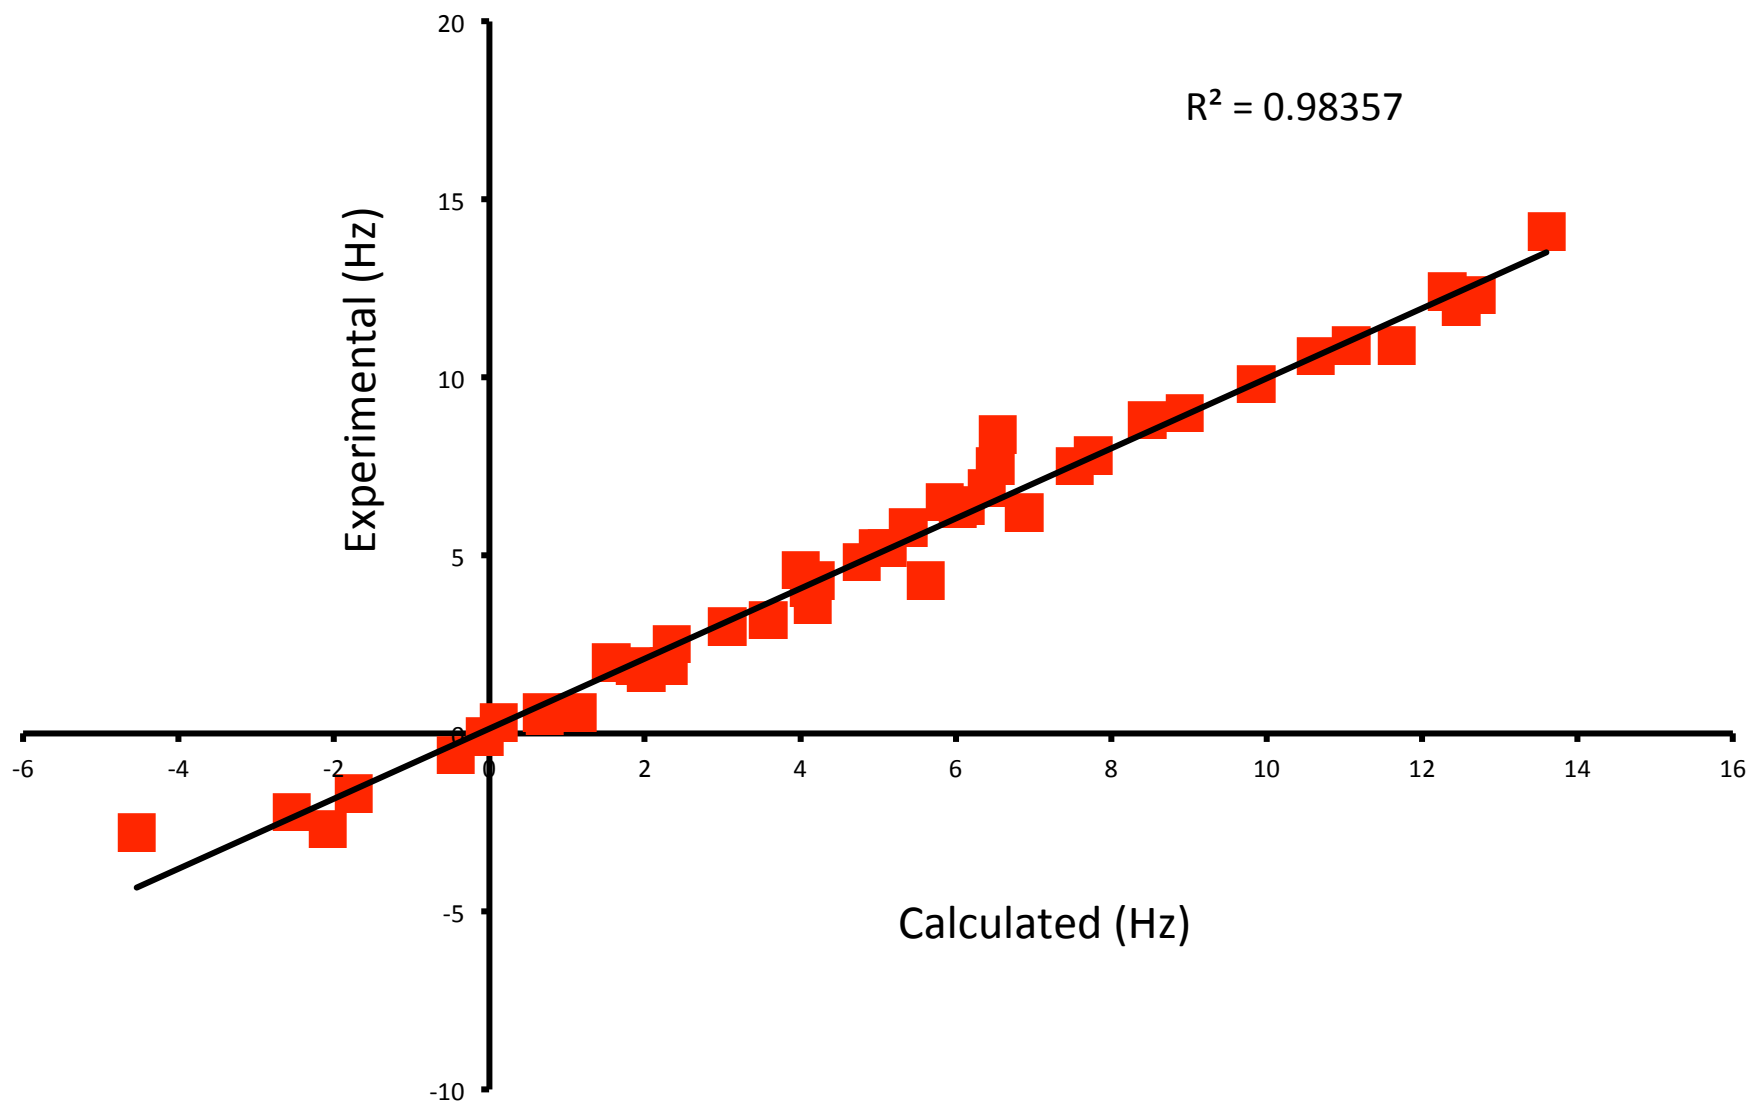

**A**rMD without RDC data

R.M.S.D. 0.65

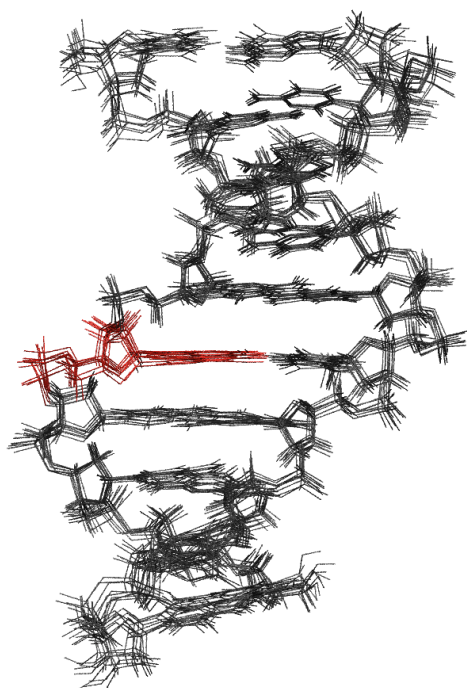**B**rMD with RDC

R.M.S.D. 0.63

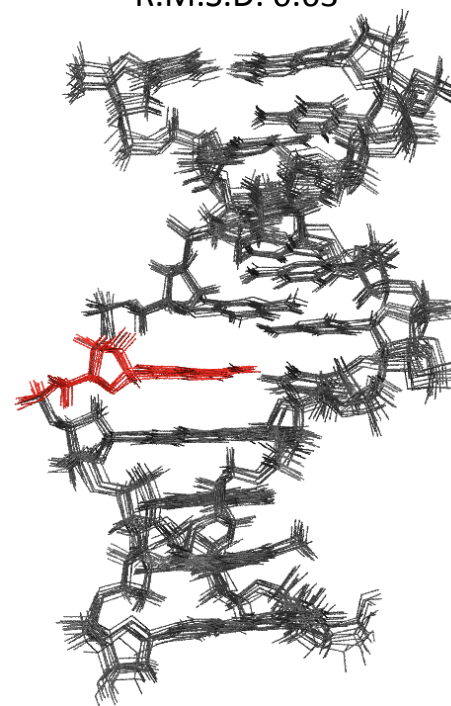**C**Restraint SetRMSD

|                              |        |
|------------------------------|--------|
| No restraints                | 0.86 Å |
| RDC restraints only          | 0.69 Å |
| RDC, BB, WC, Sugar           | 0.72 Å |
| BB, WC, Sugar, Distance      | 0.62 Å |
| RDC, BB, WC, Sugar, Distance | 0.54 Å |

SI\_5

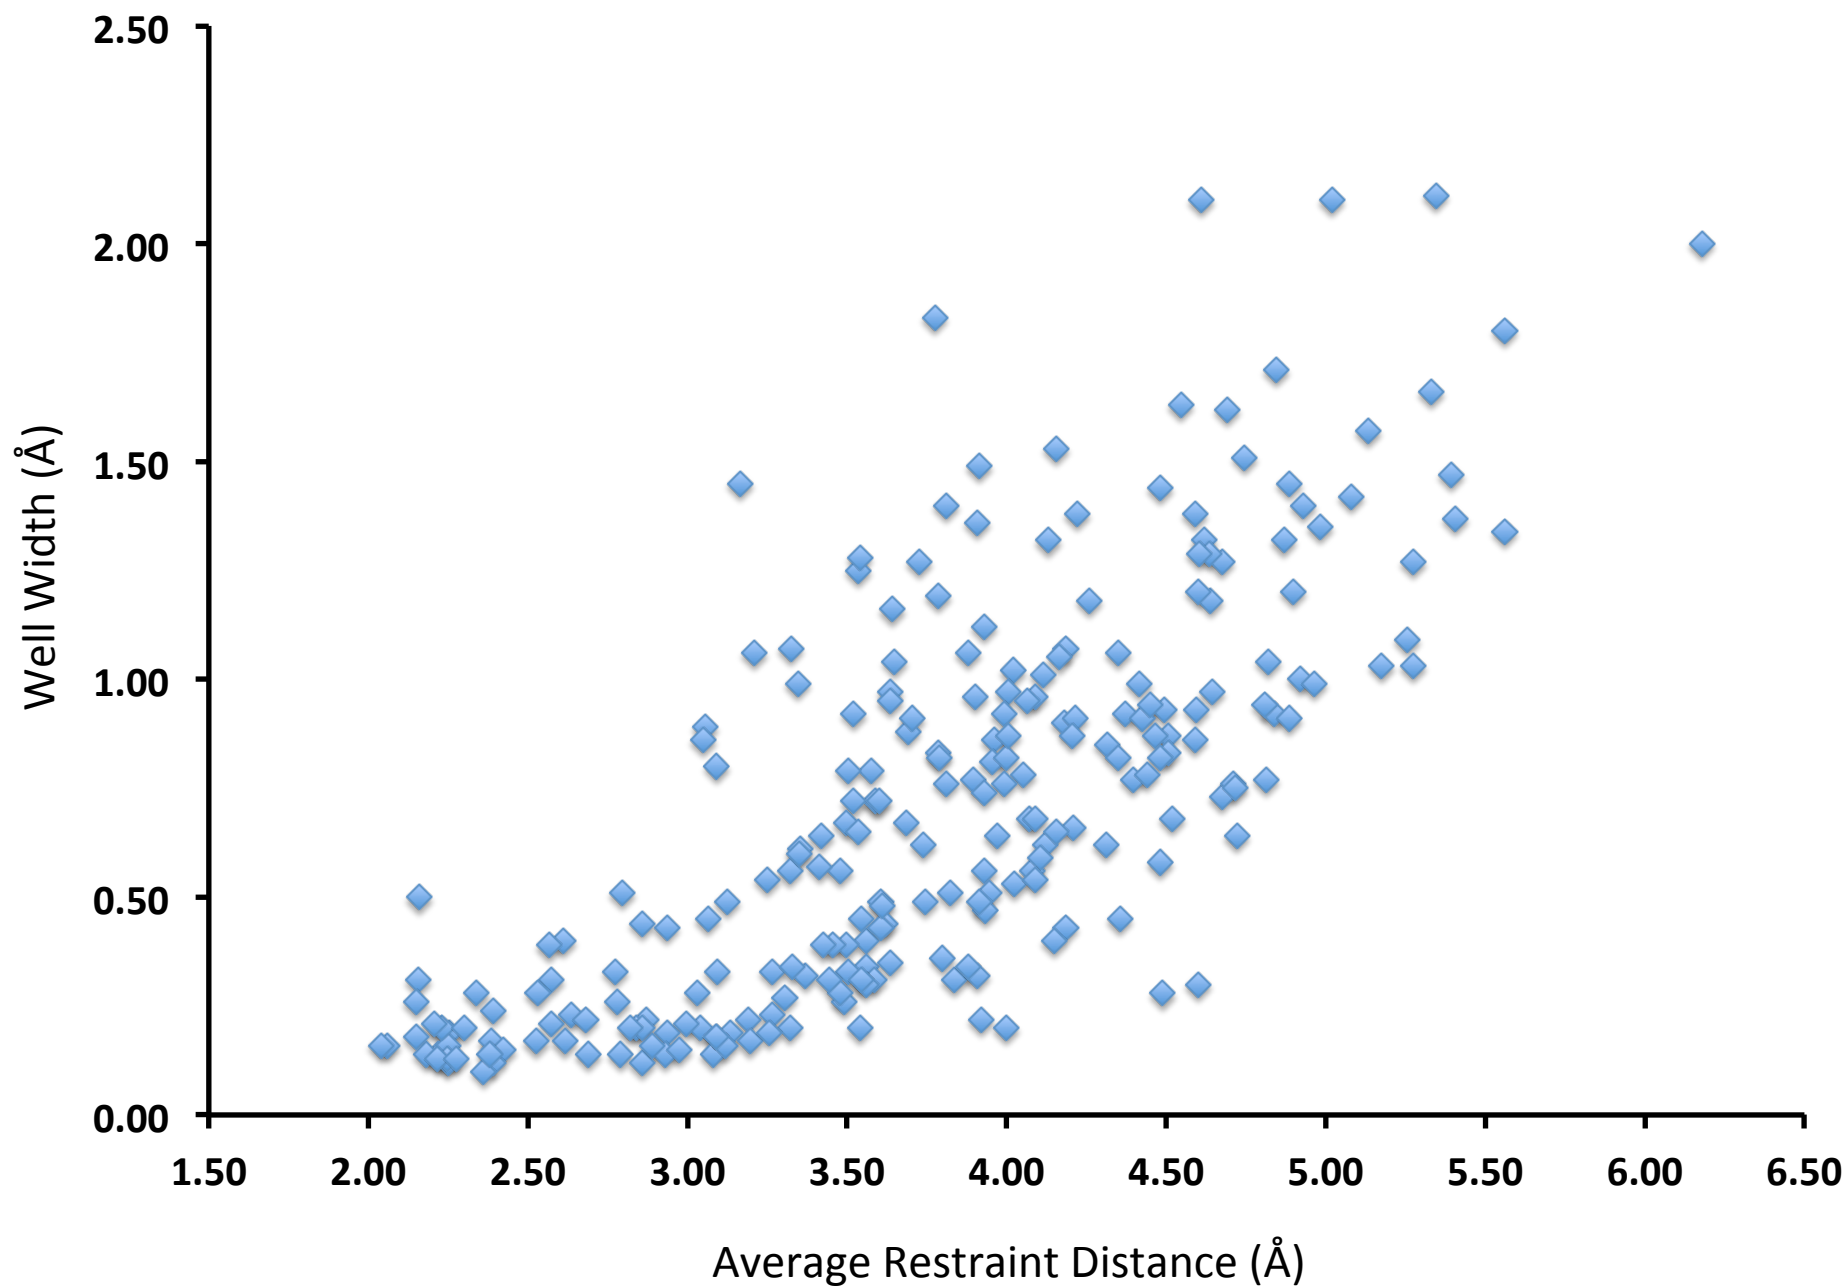

Supplement: NIHMS347118-supplement-02.pdf [file NIHMS347118-supplement-02.pdf]
